# Supplementary material for: Fine Mapping and Candidate Gene Prediction of Tuber Shape Controlling Ro Locus Based on Integrating Genetic and Transcriptomic Analyses in Potato
Source: MDPI journal article supplement (doi:10.3390/ijms23031470), 2022-01-27
Supplement: s1 [file s1]

**Supplemental Table S1:** The mean and ranges of progeny length/width (LW) of the parental and F1 population from 2014 to 2017.

| Year | Male parent | Female parent | Population mean | Range of individual values |
|------|-------------|---------------|-----------------|----------------------------|
| 2014 | 0.91        | 2.04          | 1.27            | 0.62-2.62                  |
| 2015 | 0.99        | 1.94          | 1.23            | 0.72-2.42                  |
| 2016 | 1           | 1.95          | 1.28            | 0.72-2.58                  |
| 2017 | 1           | 1.84          | 1.25            | 0.72-2.36                  |

**Supplemental Table S2:** LW values of population I

| Materials number     | LW   | Description |
|----------------------|------|-------------|
| S400 (male parent)   | 1.01 | round       |
| S497 (female parent) | 1.77 | oval        |
| S400497-60           | 0.75 | compressed  |
| S400497-64           | 0.78 | compressed  |
| S400497-20           | 0.91 | round       |
| S400497-89           | 0.94 | round       |
| S400497-83           | 1.00 | round       |
| S400497-66           | 1.01 | round       |
| S400497-45           | 1.02 | round       |
| S400497-90           | 1.02 | round       |
| S400497-47           | 1.05 | round       |
| S400497-56           | 1.06 | round       |
| S400497-30           | 1.07 | round       |
| S400497-50           | 1.08 | round       |
| S400497-1            | 1.09 | round       |
| S400497-73           | 1.10 | round       |
| S400497-32           | 1.11 | round       |
| S400497-7            | 1.13 | round       |
| S400497-49           | 1.14 | round       |
| S400497-34           | 1.15 | round       |
| S400497-55           | 1.17 | round       |
| S400497-68           | 1.18 | round       |
| S400497-82           | 1.20 | round       |
| S400497-11           | 1.25 | round-oval  |
| S400497-19           | 1.28 | round-oval  |
| S400497-63           | 1.31 | round-oval  |
| S400497-33           | 1.32 | round-oval  |
| S400497-84           | 1.32 | round-oval  |
| S400497-24           | 1.34 | round-oval  |
| S400497-74           | 1.36 | round-oval  |
| S400497-67           | 1.37 | round-oval  |
| S400497-61           | 1.42 | round-oval  |
| S400497-9            | 1.45 | round-oval  |
| S400497-23           | 1.48 | round-oval  |
| S400497-59           | 1.51 | round-oval  |
| S400497-72           | 1.55 | round-oval  |

| Materials number | LW   | Description |
|------------------|------|-------------|
| S400497-26       | 1.57 | round-oval  |
| S400497-85       | 1.57 | round-oval  |
| S400497-76       | 1.58 | round-oval  |
| S400497-46       | 1.61 | oval        |
| S400497-88       | 1.64 | oval        |
| S400497-22       | 1.67 | oval        |
| S400497-3        | 1.67 | oval        |
| S400497-41       | 1.74 | oval        |
| S400497-97       | 1.74 | oval        |
| S400497-59       | 1.75 | oval        |
| S400497-2        | 1.78 | oval        |
| S400497-57       | 1.79 | oval        |
| S400497-71       | 1.80 | oval        |
| S400497-78       | 1.80 | oval        |
| S400497-79       | 1.85 | oval        |
| S400497-4        | 1.88 | oval        |
| S400497-48       | 1.96 | oval        |
| S400497-13       | 1.97 | oval        |
| S400497-25       | 2.01 | long-oval   |
| S400497-43       | 2.02 | long-oval   |
| S400497-29       | 2.07 | long-oval   |
| S400497-92       | 2.24 | long-oval   |
| S400497-81       | 2.31 | long-oval   |
| S400497-70       | 2.34 | long-oval   |
| S400497-58       | 2.37 | long-oval   |
| S400497-51       | 2.39 | long-oval   |
| S400497-28       | 2.41 | long        |
| S400497-86       | 2.45 | long        |
| S400497-75       | 2.66 | long        |
| S400497-21       | 2.89 | long        |

**Supplemental Table S3:** LW values of population II

| Materials number   | LW   | Description |
|--------------------|------|-------------|
| S4 (inbred parent) | 1.79 | oval        |
| S4-112             | 1.67 | oval        |
| S4-66              | 1.70 | oval        |
| S4-149             | 1.73 | oval        |
| S4-21              | 1.76 | oval        |
| S4-4               | 1.78 | oval        |
| S4-110             | 1.83 | oval        |
| S4-147             | 1.85 | oval        |
| S4-48              | 1.87 | oval        |
| S4-155             | 1.89 | oval        |
| S4-76              | 1.90 | oval        |
| S4-108             | 1.90 | oval        |
| S4-7               | 1.92 | oval        |

| Materials number | LW   | Description |
|------------------|------|-------------|
| S4-1             | 1.93 | oval        |
| S4-191           | 1.93 | oval        |
| S4-107           | 1.93 | oval        |
| S4-168           | 1.96 | oval        |
| S4-39            | 1.97 | oval        |
| S4-63            | 1.99 | oval        |
| S4-12            | 2.00 | oval        |
| S4-167           | 2.00 | oval        |
| S4-148           | 2.02 | long-oval   |
| S4-27            | 2.03 | long-oval   |
| S4-178           | 2.05 | long-oval   |
| S4-171           | 2.08 | long-oval   |
| S4-109           | 2.09 | long-oval   |
| S4-195           | 2.09 | long-oval   |
| S4-182           | 2.09 | long-oval   |
| S4-115           | 2.10 | long-oval   |
| S4-187           | 2.10 | long-oval   |
| S4-75            | 2.14 | long-oval   |
| S4-119           | 2.14 | long-oval   |
| S4-16            | 2.14 | long-oval   |
| S4-196           | 2.15 | long-oval   |
| S4-8             | 2.15 | long-oval   |
| S4-98            | 2.16 | long-oval   |
| S4-77            | 2.16 | long-oval   |
| S4-26            | 2.17 | long-oval   |
| S4-9             | 2.21 | long-oval   |
| S4-170           | 2.24 | long-oval   |
| S4-142           | 2.28 | long-oval   |
| S4-154           | 2.30 | long-oval   |
| S4-17            | 2.30 | long-oval   |
| S4-133           | 2.30 | long-oval   |
| S4-6             | 2.32 | long-oval   |
| S4-73            | 2.35 | long-oval   |
| S4-176           | 2.36 | long-oval   |
| S4-161           | 2.38 | long-oval   |
| S4-192           | 2.39 | long-oval   |
| S4-151           | 2.39 | long-oval   |
| S4-163           | 2.43 | long        |
| S4-129           | 2.46 | long        |
| S4-69            | 2.47 | long        |
| S4-70            | 2.51 | long        |
| S4-136           | 2.55 | long        |
| S4-55            | 2.56 | long        |
| S4-183           | 2.63 | long        |
| S4-68            | 2.69 | long        |
| S4-101           | 2.77 | long        |
| S4-162           | 2.77 | long        |

| Materials number | LW   | Description |
|------------------|------|-------------|
| S4-127           | 2.78 | long        |
| S4-88            | 2.85 | long        |
| S4-3             | 2.89 | long        |
| S4-93            | 2.89 | long        |
| S4-175           | 3.03 | long        |
| S4-57            | 3.05 | long        |
| S4-121           | 3.16 | long        |
| S4-125           | 3.17 | long        |
| S4-116           | 3.21 | long        |
| S4-47            | 3.21 | long        |
| S4-152           | 3.29 | long        |
| S4-139           | 3.32 | long        |
| S4-96            | 3.42 | long        |
| S4-53            | 3.82 | long        |
| S4-145           | 3.86 | long        |
| S4-124           | 3.98 | long        |
| S4-89            | 4.03 | long        |
| S4-156           | 4.40 | long        |
| S4-64            | 4.57 | long        |
| S4-80            | 5.08 | long        |
| S4-84            | 6.28 | long        |

**Supplemental Table S4:** Primers for qRT-PCR

| Number | Gene ID              | Primer Name | Primer                |
|--------|----------------------|-------------|-----------------------|
| 1      | Soltu.DM.12G026390.1 | Glucose-1-F | ACTTCTCGTACTCCGAAACGG |
|        |                      | Glucose-1-R | AACCAATCCCCCTTAGCCGTG |
| 2      | Soltu.DM.07G027830.1 | Glucose-2-F | TCAGTGGCGTACAACACCAT  |
|        |                      | Glucose-2-R | GTGCTGCTCCGTGGTATTCA  |
| 3      | Soltu.DM.07G003310.1 | Glucose-3-F | CATCACGGAGGCGATAAGGG  |
|        |                      | Glucose-3-R | GACTTTCGAGTCCGGCTTCA  |
| 4      | Soltu.DM.12G000940.1 | Glucose-4-F | TCTTGCTCCTTCCATCGGGT  |
|        |                      | Glucose-4-R | CAACGCCTGTCTCATCTGCT  |
| 5      | Soltu.DM.04G027260.1 | ABA-1-F     | ACATCACCGTTTGTTCACC   |
|        |                      | ABA-1-R     | TTGCTTGTGCTTCTCATGC   |
| 6      | Soltu.DM.06G010300.2 | ABA-2-F     | CGCCGATTCGATAACCCACA  |
|        |                      | ABA-2-R     | CGGAAGTCCCGATAACAACCA |
| 7      | Soltu.DM.02G017330.1 | IAA-1-F     | TGGTCCCAGCCCTGATAAAG  |
|        |                      | IAA-1-R     | TTGTCGGCATCGACAGAGAC  |
| 8      | Soltu.DM.03G001970.1 | IAA-2-F     | GGAGCAAGCAAGAGCTACCA  |
|        |                      | IAA-2-R     | GGATTGAACACGCTCCTCCA  |
| 9      | Soltu.DM.09G025690.1 | IAA-3-F     | TGAGCTGAGGTTAGGTTTGCC |
|        |                      | IAA-3-R     | GGCAACAGGTGGGGTTTTGA  |
| 10     | Soltu.DM.01G032750.1 | GA--1-F     | GAGGCATGTCGAAAGCATGG  |
|        |                      | GA-1-R      | ACAAGGGGCTTCCCAAAGAA  |
| 11     | Soltu.DM.02G023870.1 | GA--2-F     | GAGGTGCAGCAAATCGTCTC  |
|        |                      | GA-2-R      | AGCAAGGGCATGCTTCGTAA  |

|    |                      |                                        |                                                  |
|----|----------------------|----------------------------------------|--------------------------------------------------|
| 12 | Soltu.DM.02G013470.1 | GA--3-F<br>GA-3-R                      | AGTCCCACCTGATCCCTACTC<br>TGGCCCTCCAAAGTAAACCA    |
| 13 | Soltu.DM.10G018490.1 | 490qPCR-F<br>490qPCR-R                 | AATGGAACCTTTGCGAAACTGGC<br>TTGGTGATGAGCTTCTGTATG |
| 14 | Soltu.DM.10G018500.1 | 500qPCR-F<br>500qPCR-R                 | GACGGAGGTGAAGAGTATGGAG<br>ATGTGGTGGAAGTCTGAAATG  |
| 15 | Soltu.DM.10G018530.1 | 530-RLK-qPCR-F<br>530-RLK-qPCR-R       | GCCATGCCATGTTGACTGAT<br>AAAGGAGGCTTGCCCGTGAG     |
| 16 | Soltu.DM.10G018560.1 | 560-WRKY-qPCR-F<br>560-WRKY-qPCR-R     | TCTCCGAATTTATTCTACCC<br>CTGATGACAATGCTGCTCTA     |
| 17 | Soltu.DM.10G018550.1 | 550-AAase-qPCR-F<br>550-AAase-qPCR-R   | AAGCCACCACGACATACAAA<br>TTGCCACTCATCCAGTTCTTC    |
| 18 | Soltu.DM.10G018580.1 | 580-lung-qPCR-F<br>581-lung-qPCR-R     | TTTCAATGGGTTATGGTGTC<br>TTTCAATGGGTTATGGTGTC     |
| 19 | Soltu.DM.10G018610.1 | 610-EF-P-qPCR-F<br>610-EF-P-qPCR-R     | CAGGGAACAGCGTTGAGAAA<br>TGAAGACATACTGGGCACCA     |
| 20 | Soltu.DM.10G018650.1 | 650-Kinase-qPCR-F<br>650-Kinase-qPCR-R | GTAACAACGAGTAGGGCACG<br>GAGGCTGAGGAAGTATGAC      |
| 21 | Soltu.DM.10G018840.1 | 840-nsLTP-qPCR-F<br>840-nsLTP-qPCR-R   | AGGCATTAAGTTGTGGTCAA<br>TCGATCCGCGGTAGTCTTGGCTGA |

**Supplemental Table S5: Information of the markers used in this study**

|   | Name         | Primer sequence                                               | Product size (bp) | Tm (°C) | Restriction enzyme |
|---|--------------|---------------------------------------------------------------|-------------------|---------|--------------------|
| 1 | SCAR10-134   | CTTGGAGACGAGTTATGAACG<br>AAAGAGAGAAAGGGGTGGC                  | 530               | 55      |                    |
| 2 | SCAR24S1     | TGAGGTCAAATAGAACATAATGATA<br>ATCTAATAACTGTATGTTTATATAGATATCAA | 620               | 52      |                    |
| 3 | 13F-SCAR     | CGAACCATCTCCTATTCCG<br>CGTTGAAGAAGACGACAAAG                   | 330               | 55      |                    |
| 4 | PA28-dCAPS   | ATTACCAACGTCAACCTCTGA<br>GAGTCTGGAACCTAAATAATGAAA             | 500               | 55      | AflIII             |
| 5 | 336-CAPS     | TTGAACACGTAGTCCACTGCCACT<br>TTATGCGCTACTCGCGGGTAAACT          | 900               | 61      | SspI               |
| 6 | 1137-CAPS    | ATGGTTGACACCCTCTCCATGTGT<br>AGTGGCCAGTAAATGGCTCCCATA          | 908               | 60      | PvuII              |
| 7 | 1137-CAPSIII | GGCGTTCATATGGAACACTAGGTC<br>GATCCTACCAGTACACTGTGGTTG          | 928               | 61      | BsaBI              |
| 8 | 1137-CAPSIV  | CAAACCCAAGACCTCCTTATC<br>ACCAACAAACTCCAGTCTTC                 | 727               | 60      | FokI               |

|    | Name        | Primer sequence                                        | Product size (bp) | Tm (°C) | Restriction enzyme |
|----|-------------|--------------------------------------------------------|-------------------|---------|--------------------|
| 9  | 1137-CAPSVI | GTGTCTCCTGTGAGAGATTTG<br>TATAGATTGGAATGCGAGAACC        | 806               | 60      | AflIII             |
| 10 | 1874-CAPS   | GGCAAAGAGCAGTTGGTTCCCATTT<br>TCGTAATTGGTGGCATCACGAGGA  | 833               | 60      | BstYI              |
| 11 | 1137CAPS II | AGTTCTCATGGTGGGCCTTTCAGA<br>TATGTAGCCTGAGCTGTGTTGCCT   | 773               | 61      | AflIII             |
| 12 | 8-CAPS      | TCAAGGTCGACGCAACTCAAGTCT<br>ACCAAGCTAGCTGGAACCTTCGGA   | 800               | 60      | SpeI               |
| 13 | Eyd4        | GGTGAACCTCTCTCAATTC<br>CCTAATATAGCTGATTCCTTGTTC        | 574               | 55      | BsaXI              |
| 14 | Eyd15       | GCTCCTTGAGTATTGTCCTATCAGC<br>CAGTCCACCGTACATGAAGCTATAC | 632               | 60      | BsaXI              |
| 15 | Eyd17       | GTGATGTACGCGAACTTTAC<br>CAAGACATCTCATTCGTTGG           | 586               | 60      | BsaXI              |
| 16 | Eyd41       | CGAGTAGTCACATTGAAAG<br>CTAATAGCATGTGACCTAGTATGC        | 485               | 55      | BsaXI              |
| 17 | Eyd42       | GACATCTTGTCAATCAACACTTCAC<br>CAACACATGTTGACCATGTAAGGG  | 771               | 55      | BsaXI              |
| 18 | Eyd49       | GTACACCCCTACACAATAGAGTG<br>ACCTCTTACATCTCCTCACTTGGG    | 706               | 55      | BsaXI              |
| 19 | LRo82       | TAGGTTGTTAATATGTGCCCAAAA<br>AAAAGAAAACCTGAGCGCATCG     | 172               | 55      |                    |
